# Supplementary material for: Biophysical investigation of thymoquinone binding to ‘N’ and ‘B’ isoforms of human serum albumin: exploring the interaction mechanism and radical scavenging activity
Source: Royal Society of Chemistry journal article supplement (doi:10.1039/c4ra09892g), 2014-12-23
Supplement: c4ra09892g1.pdf [file c4ra09892g1.pdf]

**Table T-1: Three-dimensional fluorescence spectra characteristics of HSA-TQ interaction at pH7.4 and 9.0**

| <b>pH/isoform</b> | <b>System</b>     | <b>Peak 1</b><br>( $\lambda_{\text{ex}}/\lambda_{\text{em}}$ )<br>(nm/nm) | $\Delta\lambda$<br>(nm) | <b>Intensity</b><br>( <i>F</i> ) | <b>Peak 2</b><br>( $\lambda_{\text{ex}}/\lambda_{\text{em}}$ )<br>(nm/nm) | $\Delta\lambda$<br>(nm) | <b>Intensity</b><br>( <i>F</i> ) | <b>Peak 3</b><br>( $\lambda_{\text{ex}}/\lambda_{\text{em}}$ )<br>(nm/nm) | $\Delta\lambda$<br>(nm) | <b>Intensity</b><br>( <i>F</i> ) |
|-------------------|-------------------|---------------------------------------------------------------------------|-------------------------|----------------------------------|---------------------------------------------------------------------------|-------------------------|----------------------------------|---------------------------------------------------------------------------|-------------------------|----------------------------------|
| pH 7.4/N          | HSA               | 230/340                                                                   | 110                     | 295.4                            | 280/340                                                                   | 60                      | 505.3                            | 280/280→<br>350/350                                                       | 0                       | 128.1→ 195.3                     |
|                   | HSA + TQ<br>(1:1) | 230/340                                                                   | 110                     | 241.2                            | 280/340                                                                   | 60                      | 482.2                            | 280/280→<br>350/350                                                       | 0                       | 167.8→ 265.2                     |
| pH 9.0/B          | HSA               | 225/340                                                                   | 115                     | 214.0                            | 280/340                                                                   | 60                      | 345.3                            | 280/280→<br>350/350                                                       | 0                       | 130.8→ 199.1                     |
|                   | HSA + TQ<br>(1:1) | 225/340                                                                   | 115                     | 204.4                            | 280/340                                                                   | 60                      | 323.4                            | 280/280→<br>350/350                                                       | 0                       | 149.0→ 231.2                     |

**Table T-2:** Comparison between the Antioxidant Activity of TQ with ABTS<sup>•+</sup> at Specific concentration (100  $\mu$ L), and Time-Points.

| <b>pH/isoform</b> | <b>pH 7.4/N</b> | <b>pH 9.0/B</b> |
|-------------------|-----------------|-----------------|
| TQ (2500 $\mu$ M) | 47.45%          | 96.19%          |
| HSA (100 $\mu$ M) | 50.37%          | 99.98%          |
| HSA + TQ          | 81.39%          | 100%            |

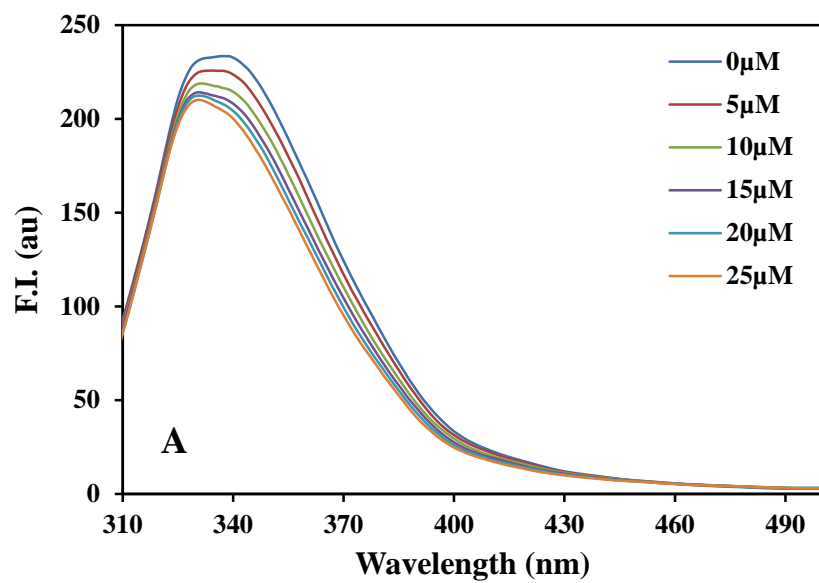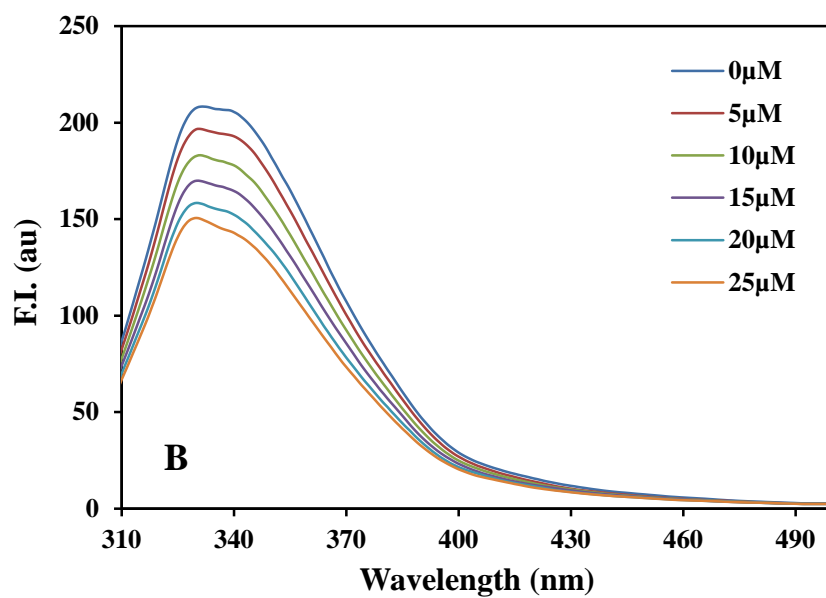

Figure: S-1

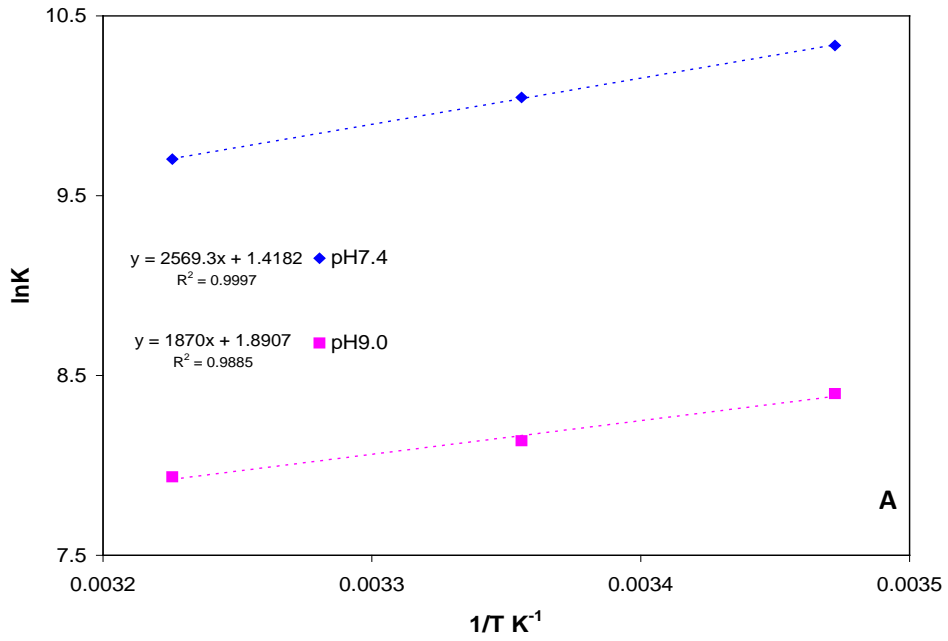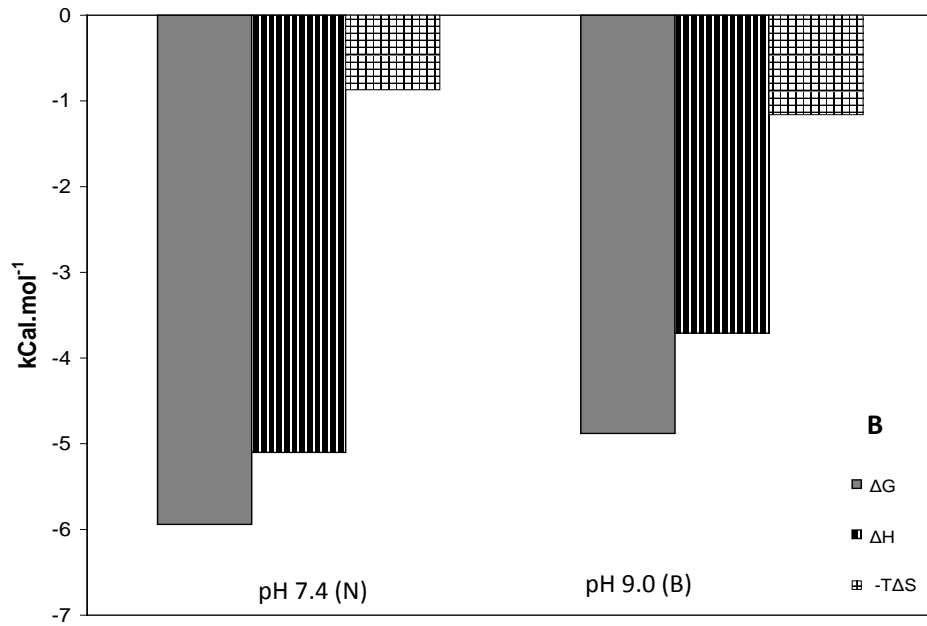

Figure: S-2

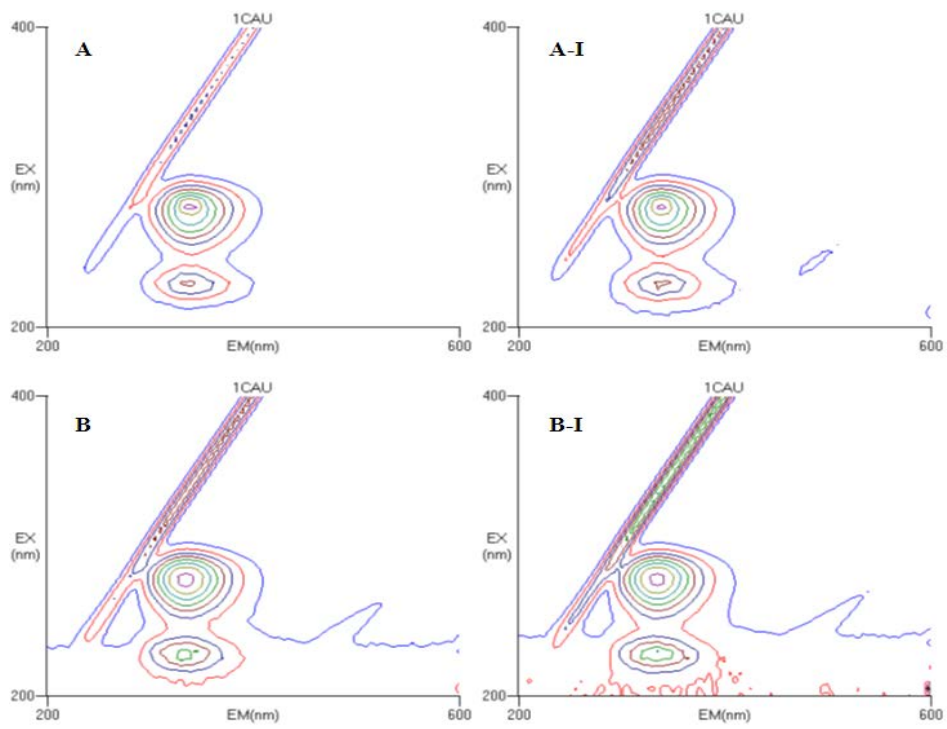

Figure: S-3

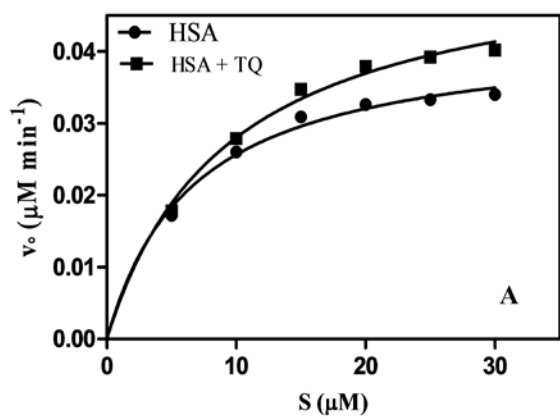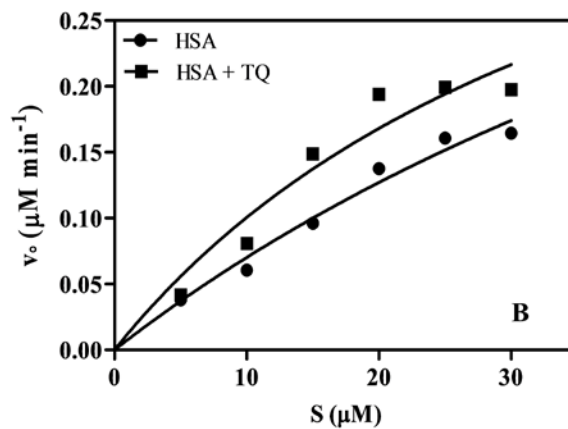

Figure: S-4
